# Supplementary material for: Influence of Sb doping on the structural and optical properties of tin oxide nanocrystals
Source: Royal Society of Chemistry journal article supplement (doi:10.1039/c3ce40241j), 2013-01-01
Supplement: c3ce40241j.pdf [file c3ce40241j.pdf]

## Influence of Sb doping on the structural and optical properties of Tin Oxide Nanocrystals

J. M. Xu, L. Li, S. Wang, H. L. Ding, Y. X. Zhang and G. H. Li

Key Laboratory of Materials Physics, Anhui Key Laboratory of Nanomaterials and Nanotechnology,  
Institute of Solid State Physics, Chinese Academy of Sciences, Hefei 230031, P.R. China

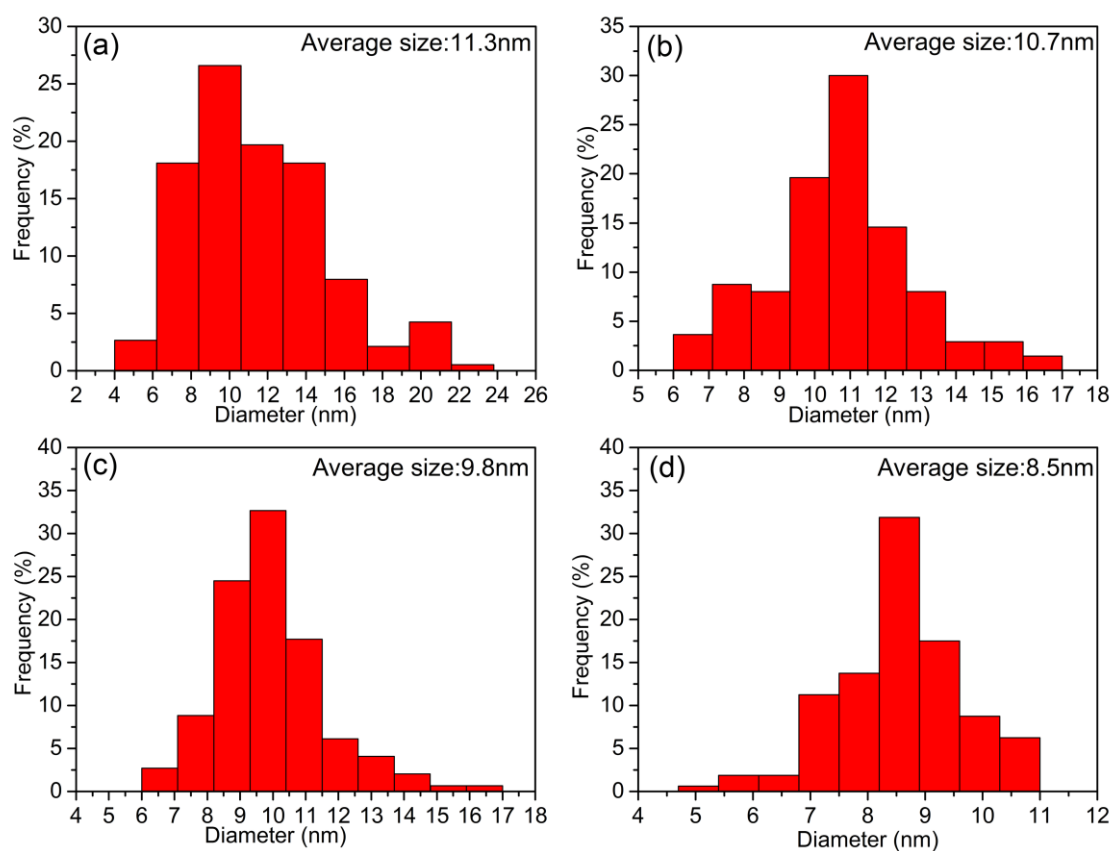

**Fig. S1.** Size distribution diagrams of SnO<sub>2</sub> nanocrystals with Sb doping content of (a) 0, (b) 2, (c) 6 and (d) 10 %

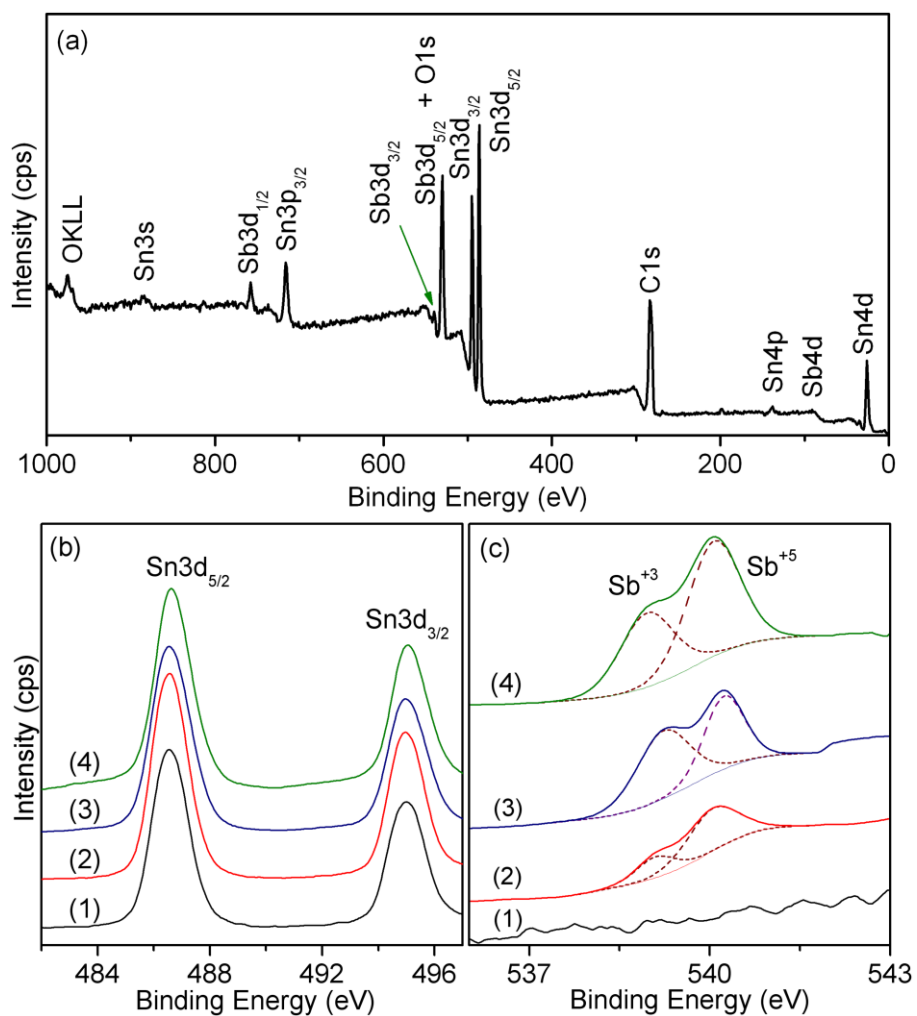

**Fig. S2.** (a) A survey XPS spectrum of 10 % ATO nanocrystals, high-resolution scan of (b) Sn 3d and (c) Sb 3d<sub>3/2</sub> of SnO<sub>2</sub> nanocrystals with Sb doping content of (1) 0, (2) 2, (3) 6 and (4) 10 %

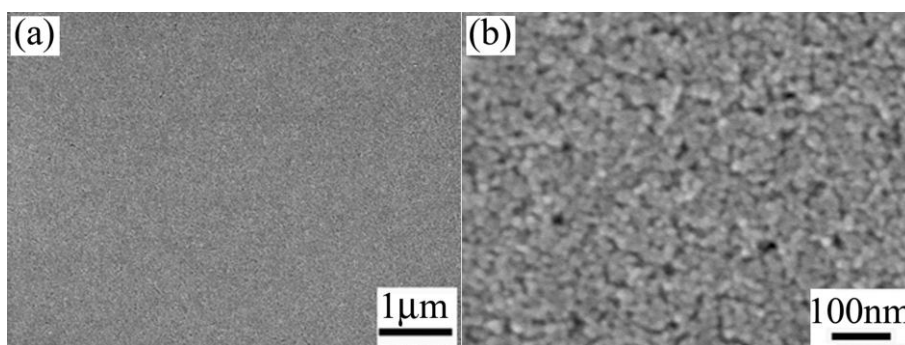

**Fig. S3.** FESEM images of 10% ATO nanocrystals film
